# Supplementary material for: Alterations in the Abundance and Co-occurrence of Akkermansia muciniphila and Faecalibacterium prausnitzii in the Colonic Mucosa of Inflammatory Bowel Disease Subjects
Source: PubMed Central journal article supplement (PMC6137959; doi:10.3389/fcimb.2018.00281), 2018-09-07
Supplement: Image_1.pdf [file Image_1.pdf]

*Supplementary Material*

**Alterations in the abundance and co-occurrence of  
*Akkermansia muciniphila* and *Faecalibacterium prausnitzii* in  
the colonic mucosa of inflammatory bowel disease subjects**

Mireia Lopez-Siles, Núria Enrich-Capó, Xavier Aldeguer, Miriam Sabat-Mir, Sylvia H. Duncan, L. Jesús Garcia-Gil\*, Margarita Martinez-Medina

\* **Correspondence:** L. Jesús Garcia-Gil, [jesus.garcia@udg.edu](mailto:jesus.garcia@udg.edu)

## Supplementary Figure

### A. UC location

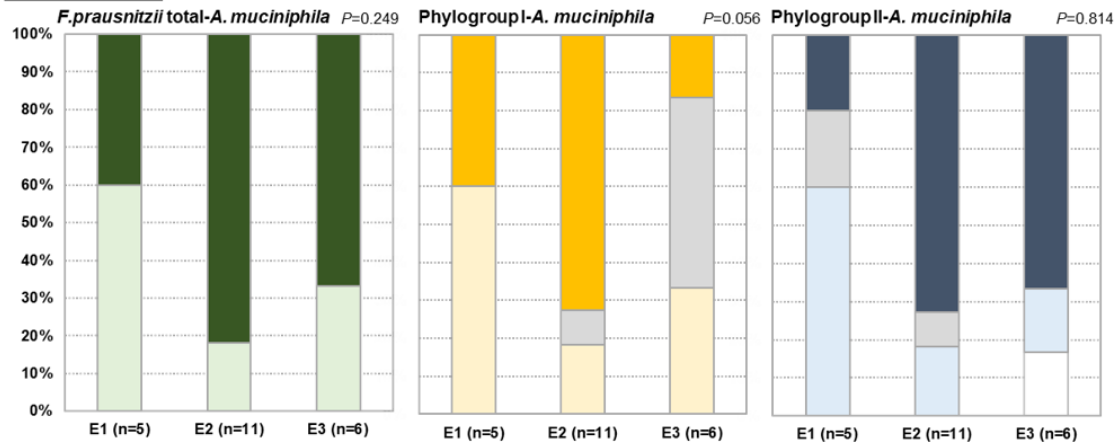

### B. CD location

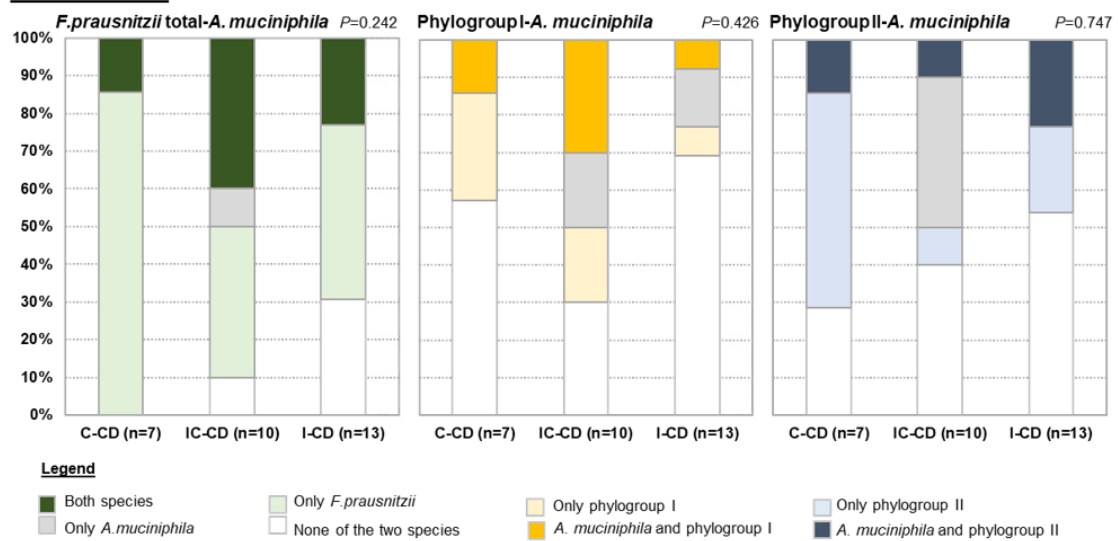

**Figure S1.** Prevalence of total *F. prausnitzii*, phylogroups and *A. muciniphila* (A) by disease subtype in patients with UC and (B) in patients with CD; UC, ulcerative colitis; CD, Crohn's disease; E1, ulcerative proctitis; E2, ulcerative left-sided colitis; E3, ulcerative pancolitis; IC-CD, ileocolonic CD, I-CD, ileal CD; C-CD, colonic CD.
