# Supplementary material for: Alterations in the Abundance and Co-occurrence of Akkermansia muciniphila and Faecalibacterium prausnitzii in the Colonic Mucosa of Inflammatory Bowel Disease Subjects
Source: PubMed Central journal article supplement (PMC6137959; doi:10.3389/fcimb.2018.00281), 2018-09-07
Supplement: Image_2.pdf [file Image_2.pdf]

*Supplementary Material*

**Alterations in the abundance and co-occurrence of  
*Akkermansia muciniphila* and *Faecalibacterium prausnitzii* in  
the colonic mucosa of inflammatory bowel disease subjects**

Mireia Lopez-Siles, Núria Enrich-Capó, Xavier Aldeguer, Miriam Sabat-Mir, Sylvia H. Duncan, L. Jesús Garcia-Gil\*, Margarita Martinez-Medina

\* **Correspondence:** L. Jesús Garcia-Gil, [jesus.garcia@udg.edu](mailto:jesus.garcia@udg.edu)

## Supplementary Figure

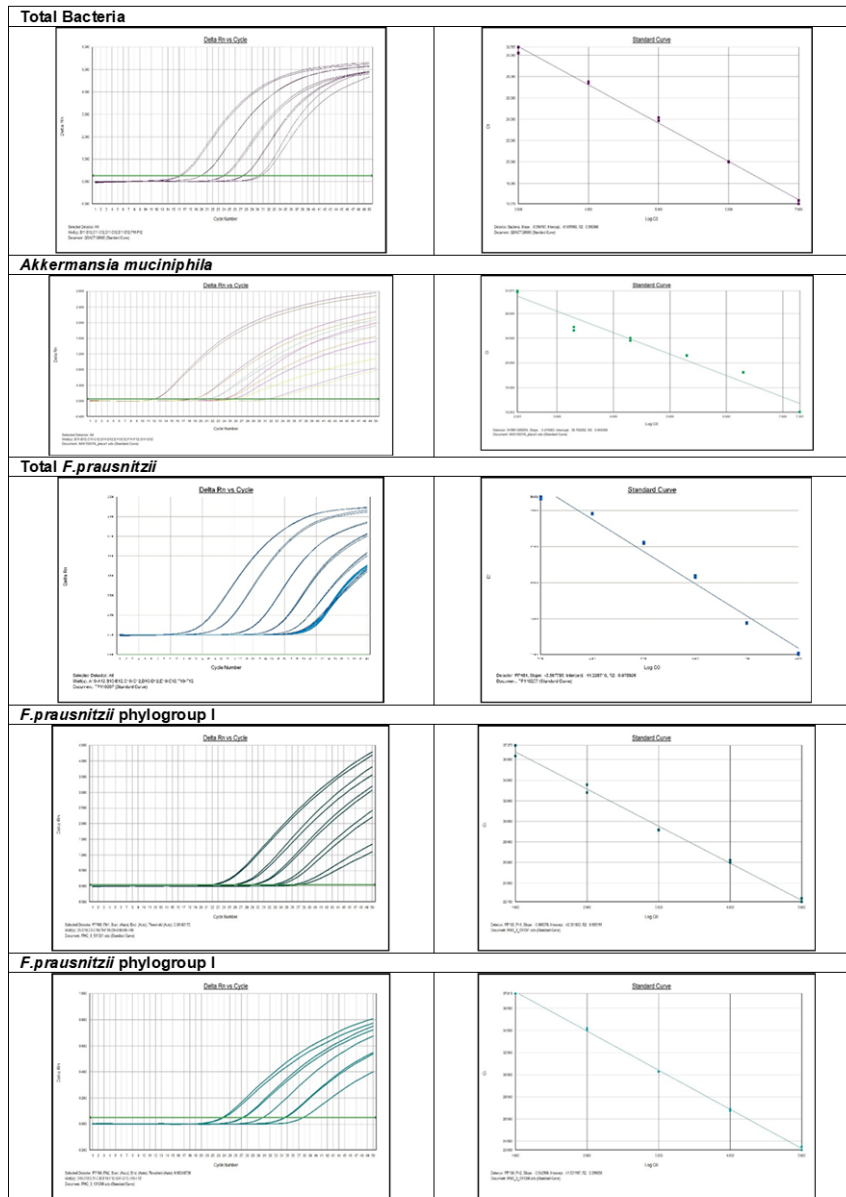

| Target microorganism                | Calibration curves slope | Calibration curves intercept | PCR efficiency calculated from slope | Amplification factor | R <sup>2</sup> of calibration curve | Dinamic range                         | LOD     |
|-------------------------------------|--------------------------|------------------------------|--------------------------------------|----------------------|-------------------------------------|---------------------------------------|---------|
| Total Bacteria                      | -3.594167                | 41.611160                    | 89.77%                               | 1.90                 | 0.996348                            | 10 <sup>7</sup> - 10 <sup>3</sup>     | 149.25  |
| <i>Akkermansia muciniphila</i>      | -3.475663                | 38.792202                    | 93.96%                               | 1.94                 | 0.9593                              | 2x10 <sup>7</sup> - 2x10 <sup>2</sup> | 1279.38 |
| <i>F. prausnitzii</i> (total)       | -3.567798                | 41.298710                    | 90.67%                               | 1.91                 | 0.978926                            | 10 <sup>7</sup> - 10 <sup>3</sup>     | 106.67  |
| <i>F. prausnitzii</i> phylogroup I  | -3.605976                | 40.351883                    | 89.37%                               | 1.89                 | 0.995111                            | 10 <sup>6</sup> - 10                  | 110.261 |
| <i>F. prausnitzii</i> phylogroup II | -3.542106                | 41.531197                    | 91.57%                               | 1.92                 | 0.999055                            | 10 <sup>6</sup> - 10                  | 239.462 |

**Figure S2.** qPCR standard curves and parameters.
