# Supplementary material for: Alterations in the Abundance and Co-occurrence of Akkermansia muciniphila and Faecalibacterium prausnitzii in the Colonic Mucosa of Inflammatory Bowel Disease Subjects
Source: PubMed Central journal article supplement (PMC6137959; doi:10.3389/fcimb.2018.00281), 2018-09-07
Supplement: Image_3.pdf [file Image_3.pdf]

*Supplementary Material*

**Alterations in the abundance and co-occurrence of  
*Akkermansia muciniphila* and *Faecalibacterium prausnitzii* in  
the colonic mucosa of inflammatory bowel disease subjects**

Mireia Lopez-Siles, Núria Enrich-Capó, Xavier Aldeguer, Miriam Sabat-Mir, Sylvia H. Duncan, L. Jesús Garcia-Gil\*, Margarita Martinez-Medina

\* **Correspondence:** L. Jesús Garcia-Gil, [jesus.garcia@udg.edu](mailto:jesus.garcia@udg.edu)

## Supplementary Figure

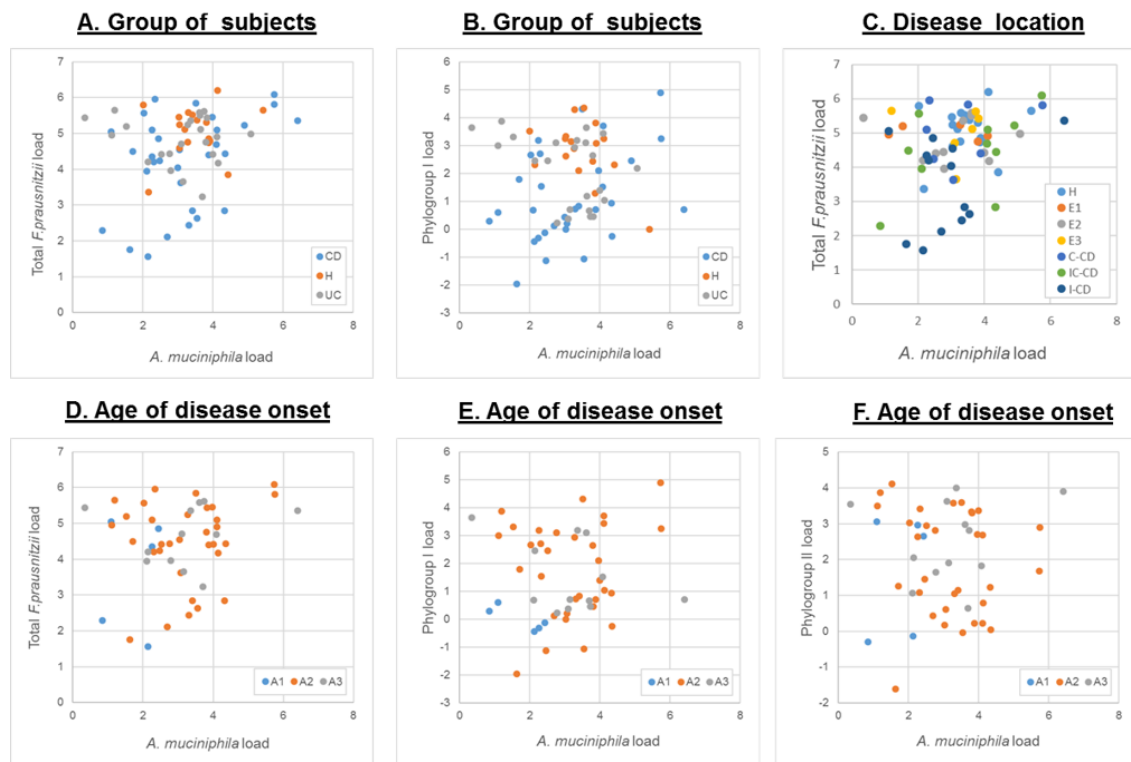

**Figure S3.** Biplots representing mucosa-associated *F. prausnitzii* and *A. muciniphila* in several groups of subjects (A) Total *F. prausnitzii* and *A. muciniphila* load by condition (B) Phylogroup I and *A. muciniphila* by condition. (C) Total *F. prausnitzii* and *A. muciniphila* by inflammatory bowel disease subtype (D to F) Total *F. prausnitzii*, Phylogroup I or Phylogroup II and *A. muciniphila* load by age of disease onset, respectively.

H, control subjects; UC, ulcerative colitis; CD, Croh's disease; E1, ulcerative proctitis; E2, ulcerative left-sided colitis; E3, ulcerative pancolitis; IC-CD, ileocolonic CD, I-CD, ileal CD; C-CD, colonic CD.

*A. muciniphila* load = Log (16S rRNA gene *Akkermansia*/16S rRNA gene million bacteria)

Total *F. prausnitzii* load = Log (16S rRNA gene total *F. prausnitzii*/16S rRNA gene million bacteria)

Phylogroup I load = Log (16S rRNA gene total *F. prausnitzii* phylogroup I/16S rRNA gene million bacteria)

Phylogroup II load = Log (16S rRNA gene total *F. prausnitzii* phylogroup II/16S rRNA gene million bacteria)
